# Supplementary material for: Time-resolved spectroscopic analysis of the light-energy harvesting mechanism in carbazole-dendrimers with a blue-phosphorescent Ir-complex core
Source: Royal Society of Chemistry journal article supplement (doi:10.1039/c7cp01989k), 2017-01-01
Supplement: c7cp01989k1.pdf [file c7cp01989k1.pdf]

## Time-resolved spectroscopic analysis of the light-energy harvesting mechanism in carbazole-dendrimers with blue-phosphorescent Ir-complex core

Yang-Jin Cho,<sup>a</sup> So-Yoen Kim,<sup>a</sup> Mi Rang Son,<sup>a</sup> Ho-Jin Son,<sup>a\*</sup> Dae Won Cho,<sup>ab\*</sup> and Sang Ook Kang<sup>a\*</sup>

<sup>a</sup>Department of Advanced Materials Chemistry, Korea University (Sejong), Sejong, 30019, South Korea. E-mail: [sangok@korea.ac.kr](mailto:sangok@korea.ac.kr)

<sup>b</sup>Center for Photovoltaic Materials, Korea University (Sejong), Sejong, 30019, South Korea. E-mail: [dwcho@korea.ac.kr](mailto:dwcho@korea.ac.kr)

### Figures

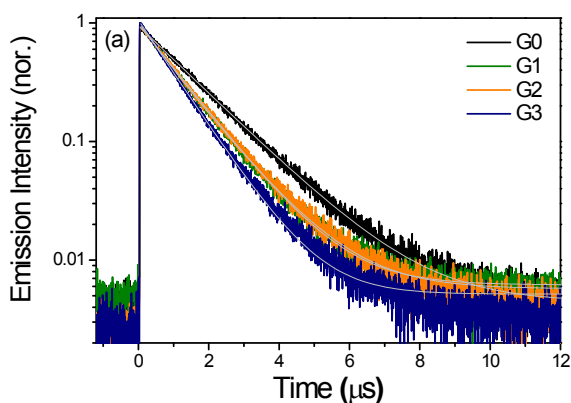

**Fig. S1** Decay profiles of **G0-G3** in  $\text{CH}_2\text{Cl}_2$  at 296 K.  $\lambda_{\text{ex}} = 309$  nm. Monitoring wavelength is 480 nm.

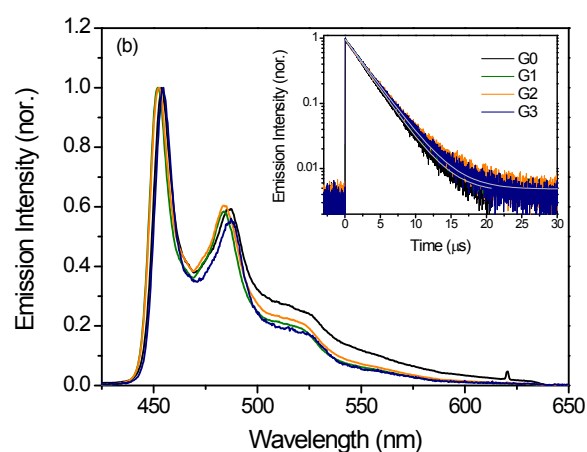

**Fig. S2** Phosphorescence spectra of **G0-G3** in MTHF at 77 K, and their decay profiles (inset figure) monitored at 480 nm.  $\lambda_{\text{ex}}$  is 309 nm.

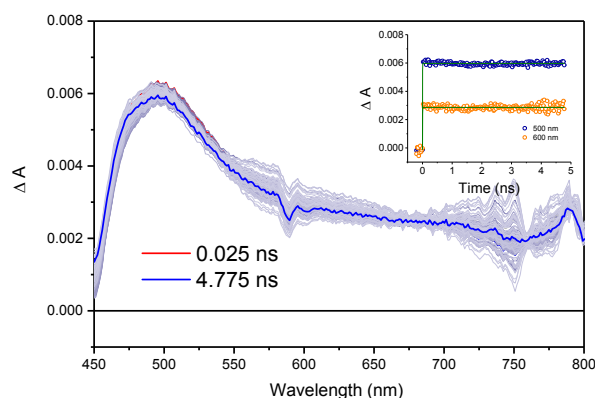

**Fig. S3** Transient absorption spectra of **G0** in Ar-saturated  $\text{CH}_2\text{Cl}_2$ . Excitation wavelength is 310 nm. Inset figure indicates decay profiles monitored at 600 nm (orange circle) and 500 nm (navy-colour circle), green solid lines indicate the fitting values.

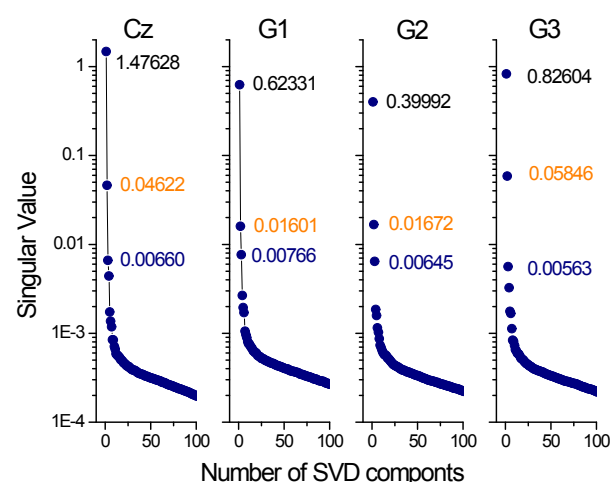

**Fig. S4** Singular values decomposed by the SVD analysis. The three largest singular values for **Cz** and **G1-G3** are plotted in spectral and temporal profiles of Fig 5 in main text.
